# Supplementary material for: Fabrication of a ternary biocomposite film based on polyvinyl alcohol, cellulose nanocrystals, and silver nanoparticles for food packaging
Source: Royal Society of Chemistry journal article supplement (doi:10.1039/d4ra02085e), 2024-01-01
Supplement: d4ra02085e1.pdf [file d4ra02085e1.pdf]

**Fabrication of ternary biocomposite film based on polyvinyl alcohol, cellulose nanocrystals,  
and silver nanoparticles for food packaging**

*Long Hoang Nguyen*<sup>a, b, c</sup>, *Trang Thanh Tran*<sup>a, b</sup>, *Thanh - My T. Nguyen*<sup>a, b</sup>, *Hieu Van Le*<sup>a, b, c</sup>,  
*Kim – Phung L. Nguyen*<sup>d</sup>, and *An Nang Vu*<sup>a, b\*</sup>

<sup>a</sup> *Faculty of Materials Science and Technology, University of Science, VNU–HCM, 700000, Vietnam.*

<sup>b</sup> *Vietnam National University Ho Chi Minh City, 700000, Vietnam.*

<sup>c</sup> *Laboratory of Multifunctional Materials, University of Science, VNU–HCM, 700000, Vietnam.*

<sup>d</sup> *Institute of Science and Technology for Energy and Environment, Vietnam Academy of Science and Technology, 700000, Vietnam.*

\* *Corresponding author. E-mail address: vnan@hcmus.edu.vn*

**Supporting information**

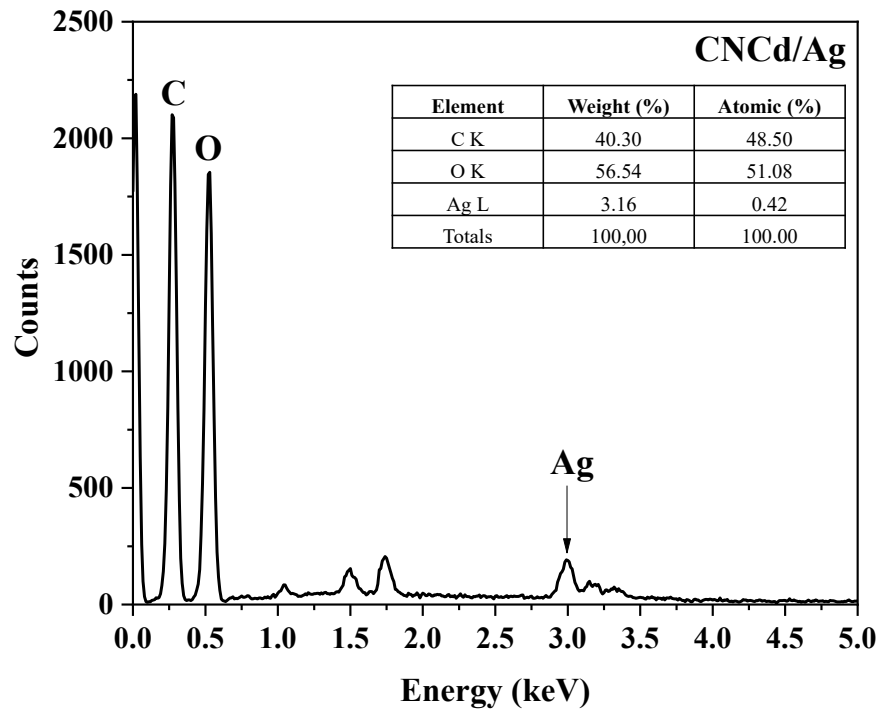

Fig. S1. EDX spectra of CNCd/Ag

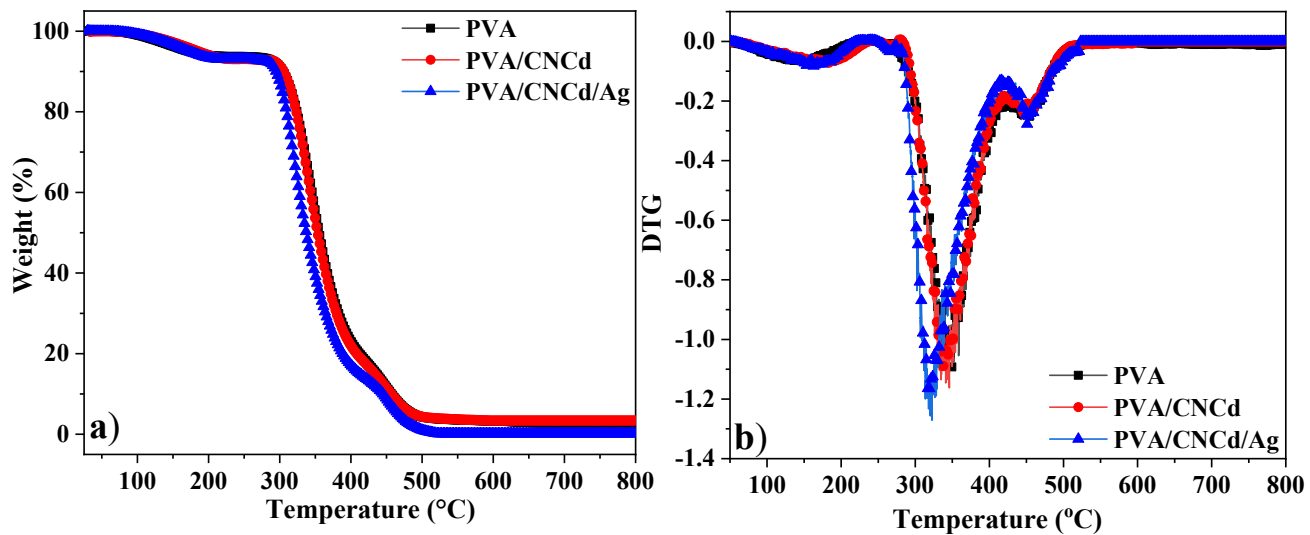

**Fig. S2.** TGA (a) and DTG (b) curves of PVA, PVA/CNCd, and PVA/CNCd/Ag films

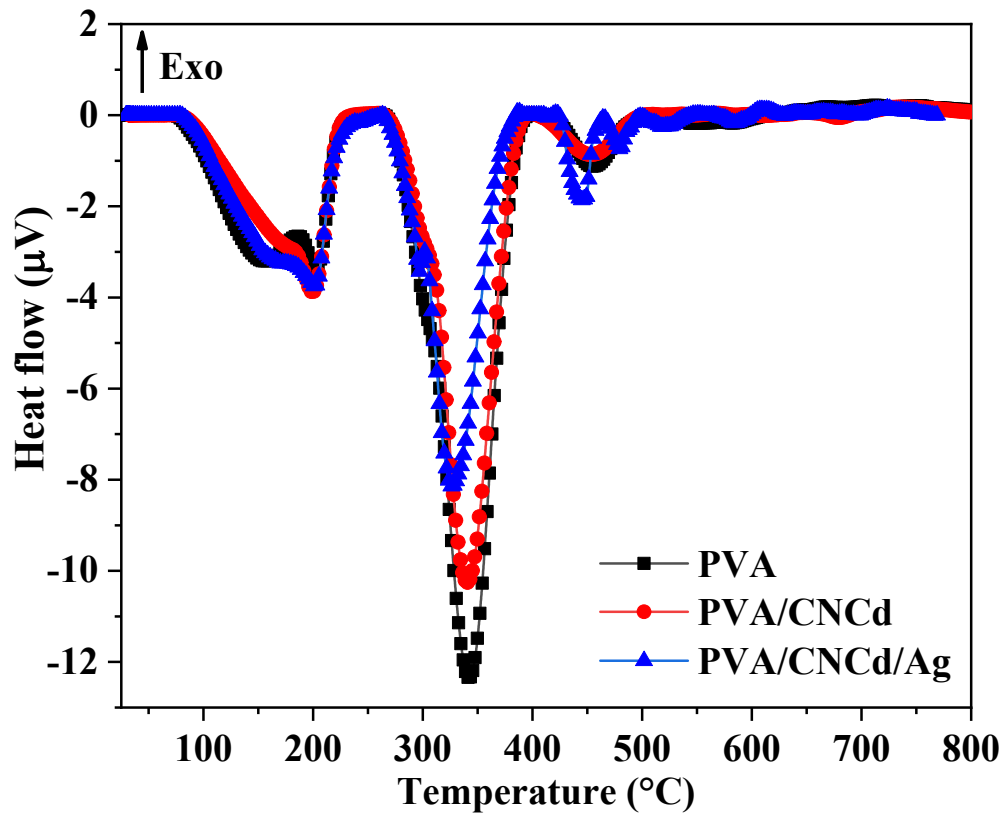

**Fig. S3.** DTA curves of PVA, PVA/CNCd, and PVA/CNCd/Ag films
